# Supplementary material for: Nuclear TRADD prevents DNA damage-mediated death by facilitating non-homologous end-joining repair
Source: PubMed Central journal article supplement (PMC5469829; doi:10.1038/s41598-017-03211-z), 2017-06-13

## Supplementary information

# Nuclear TRADD prevents DNA damage-mediated death by facilitating non-homologous end-joining repair

Gi-Bang Koo<sup>1, 2, #</sup>, Jae-Hoon Ji<sup>3, #</sup>, Hyeseong Cho<sup>1, 2, 3</sup>, Michael J. Morgan<sup>4</sup> and You-Sun Kim<sup>1, 2, \*</sup>

<sup>1</sup> Department of Biochemistry, Ajou University School of Medicine, Suwon, Gyeonggi, 16499, Republic of Korea

<sup>2</sup> Department of Biomedical Sciences, graduate School, Ajou University, Suwon, Gyeonggi, 16499, Republic of Korea

<sup>3</sup> Genomic Instability Research Center, Ajou University School of Medicine, Suwon, Gyeonggi, 16499, Republic of Korea

<sup>4</sup> Department of Pharmacology, University of Colorado School of Medicine, Aurora, Colorado, 80045, USA

# These authors contributed equally to this work.

\* To whom correspondence should be addressed. Tel:82-31-219-4509; Fax: 82-31-219-4530; Email:[yousunkim@ajou.ac.kr](mailto:yousunkim@ajou.ac.kr)

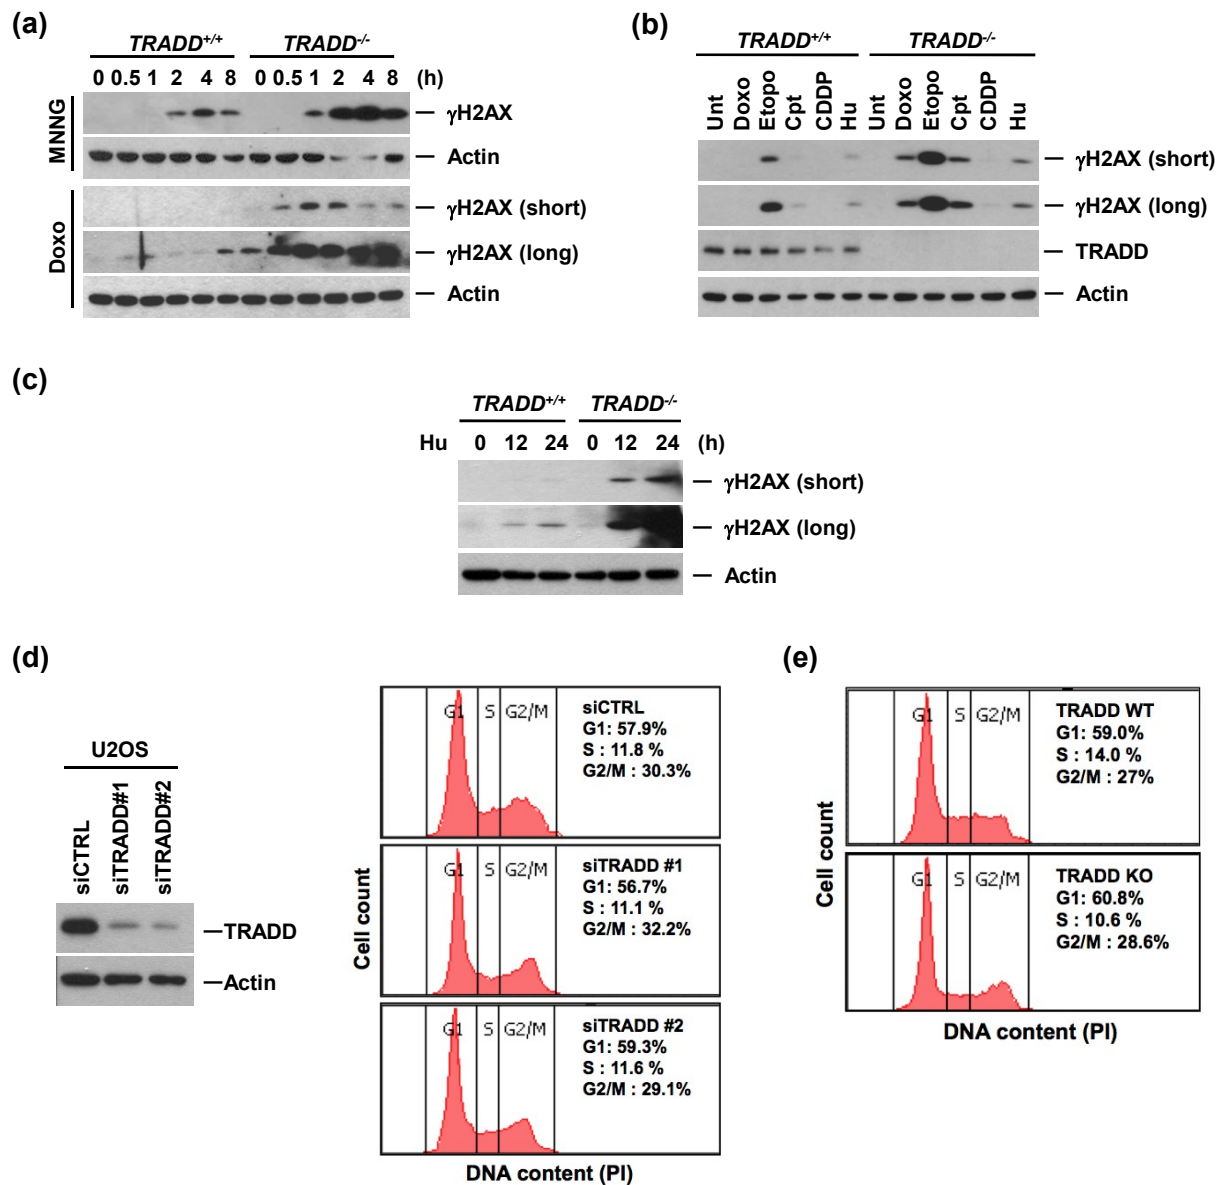

**Supplementary figure S1. TRADD regulates DNA repair following treatment of DNA damage agents.**

(A) Western blotting analysis shows  $\gamma$ H2AX and Actin in *TRADD*<sup>+/+</sup> and *TRADD*<sup>-/-</sup> MEF cells treated with MNNG (0.25 mM) or doxorubicin (2.5  $\mu$ M), respectively. (B) Impaired DDR (DNA damage response) in *TRADD*<sup>-/-</sup> MEFs is a common phenotype. Deficiency of TRADD induces unrepaired DNA damage compared with wild type cells in response to various DNA damaging agents (Doxo 2.5  $\mu$ M, Etoposide 25  $\mu$ M, Cpt 2.5  $\mu$ g/mL, CDDP 25  $\mu$ M, Hu 2.5 mM) for 2hrs. (C) *TRADD*<sup>+/+</sup> and *TRADD*<sup>-/-</sup> MEF cells treated with Hu 2.5mM for indicated times. (D) Cell cycle analysis of TRADD knockdown into U2OS cells. The cells were transfected with siCTRL, siTRADD #1, and siTRADD #2 for 48 hrs. Cell cycle analysis was performed by PI staining. Western blotting shows TRADD knockdown efficiency in U2OS cells. (E) Cell cycle analysis by PI staining of *TRADD*<sup>+/+</sup> and *TRADD*<sup>-/-</sup> MEF cells.

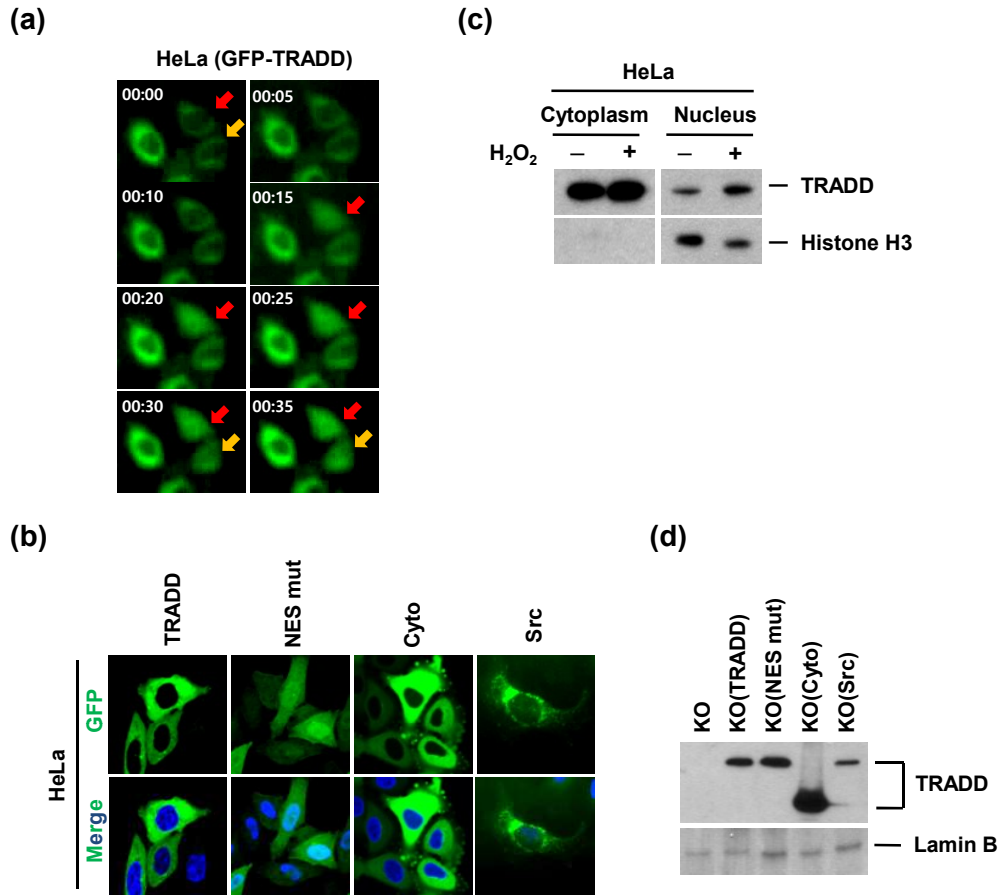

**Supplementary figure S2. Cytoplasmic TRADD is translocated into nucleus upon DNA damage.**

**(A)** HeLa cells were transfected with GFP-TRADD and treated with H<sub>2</sub>O<sub>2</sub> (0.5 mM) for indicated times (minutes). Live cell images were analyzed by JuLI stage (live cell imaging system). **(B)** Localization of TRADD constructs into HeLa cells. Cells were transfected with wild type-TRADD (TRADD), (nuclear export sequence) mutant-TRADD (NES mut), cytoplasmic-TRADD (Cyto), and Src-myristoylated-TRADD (Src). **(C)** HeLa cells were treated with H<sub>2</sub>O<sub>2</sub> (0.5 mM, 2 hrs). Cells were fractionated into cytoplasmic and nuclear fractions using an NE-PER fractionation kit, and then analyzed by western blotting. **(D)** Western blotting shows that expression of TRADD constructs in TRADD<sup>-/-</sup> MEFs.

(a)

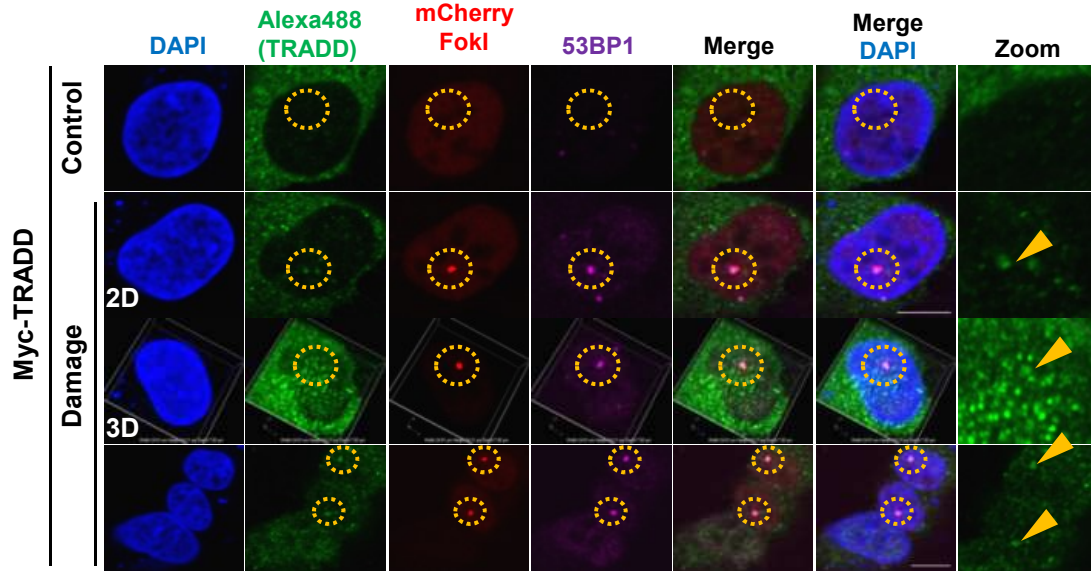

(b)

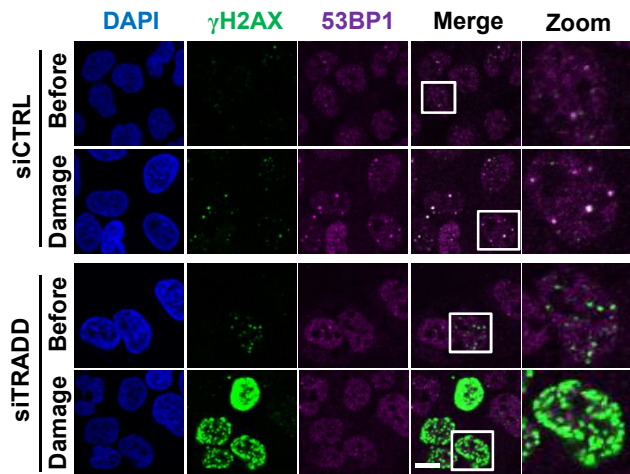

(c)

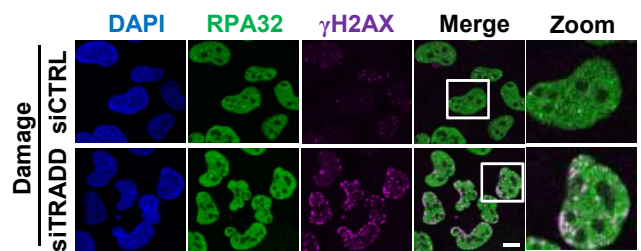

**Supplementary figure S3. TRADD is translocated at DSB site and downregulates 53BP1 foci formation, but not RPA32 foci formation upon DNA damage.**

(A) Colocalization of Myc-TRADD and mCherry-FokI at single DNA double-strand break site. Constructs of Myc-TRADD and mCherry-FokI were cotransfected into U2OS 2-6-3 cell lines. After 48 hrs, cells were fixed and stained with anti-53BP1 and anti-Myc antibodies. DAPI was used for nuclear staining. Images were analyzed confocal microscope (Nikon A1). 2D, two-dimensional analysis for images; 3D, three-dimensional analysis for images. Scale bar, 10  $\mu$ m. (B,C) After 48 hrs transfection with TRADD targeting siRNAs into U2OS cell lines, cells treated with phleomycin (50  $\mu$ g/mL, 1 hr). After wash out with fresh medium, endogenous 53BP1 (B) and RPA32 (C) were stained with each antibody at DNA break sites, 3 hrs later.  $\gamma$ H2AX was used as a DNA damage marker at DNA break sites.

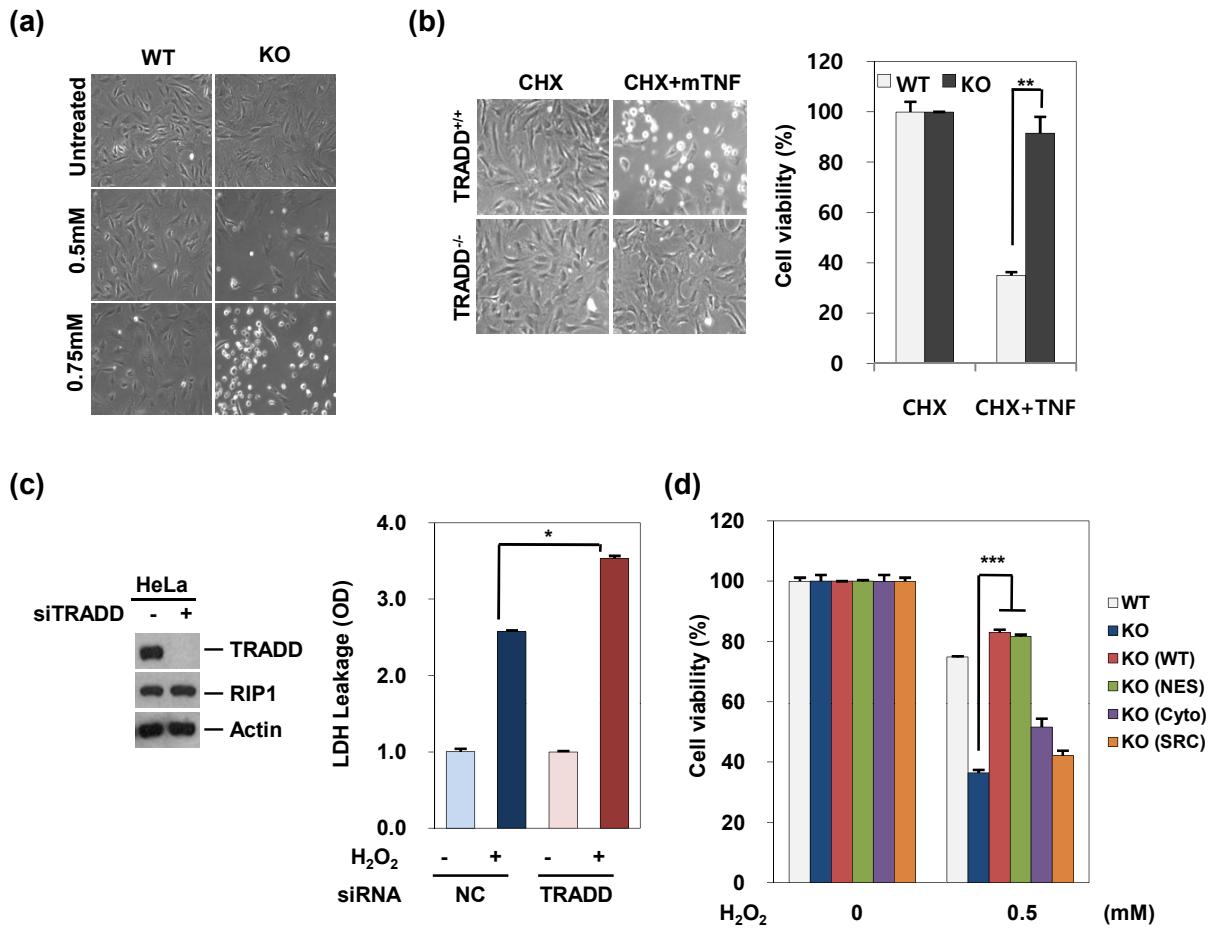

**Supplementary figure S4. Deficiency of TRADD sensitizes DNA damage-induced cell death.**

**(A)** Phase contrast images of TRADD<sup>+/+</sup> (WT) and TRADD<sup>-/-</sup> (KO) MEFs treated with H<sub>2</sub>O<sub>2</sub> (24 hrs). **(B)** Phase contrast images (left panel) and MTT viability assay (right panel, Error bars: +/- S.E.M.) of TRADD<sup>+/+</sup> and TRADD<sup>-/-</sup> MEFs treated with CHX (2.5 µg/mL) plus TNF (30 ng/mL, 24 hrs). \*\*P < 0.01 (Student's t-test). **(C)** HeLa cells were transfected with siRNA TRADD or siRNA control (NC), respectively. After 48 hrs, the cells were treated with H<sub>2</sub>O<sub>2</sub> for 24 hrs. Cell viability was analyzed by LDH assay. \*P < 0.05 (Student's t-test). **(D)** MTT assay of TRADD<sup>+/+</sup> (WT), TRADD<sup>-/-</sup> (KO), TRADD<sup>-/-</sup> (KO (WT)), TRADD<sup>-/-</sup> (KO (NES mutant TRADD : NES)), TRADD<sup>-/-</sup> (KO (Cytoplasmic mutant TRADD : Cyto)) and TRADD<sup>-/-</sup> (KO (Src-TRADD:SRC)) MEFs treated with H<sub>2</sub>O<sub>2</sub> for 24 hrs. \*\*\*P < 0.001 (Student's t-test).

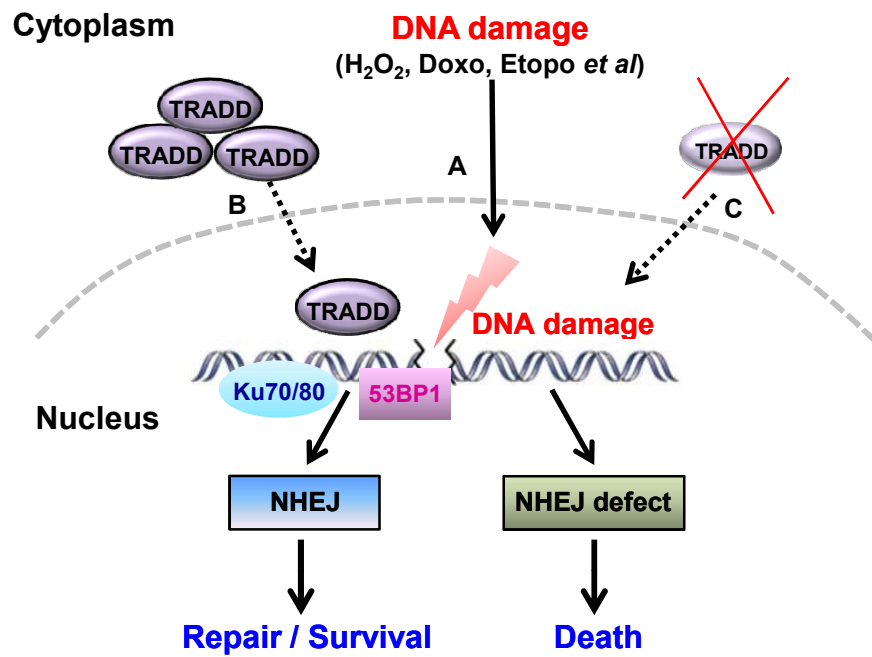

**Supplementary figure S5. Proposed model.**

(A,B) DNA damage promotes translocation of TRADD from cytoplasm to the nucleus. Nuclear TRADD facilitates DNA repair through promoting of non-homologous end-joining (NHEJ) repair. (C) If broken DNA is impaired by deficiency of TRADD, cells are more sensitive to DNA damage-induced cell death.

Figure raw data.

Figure 1

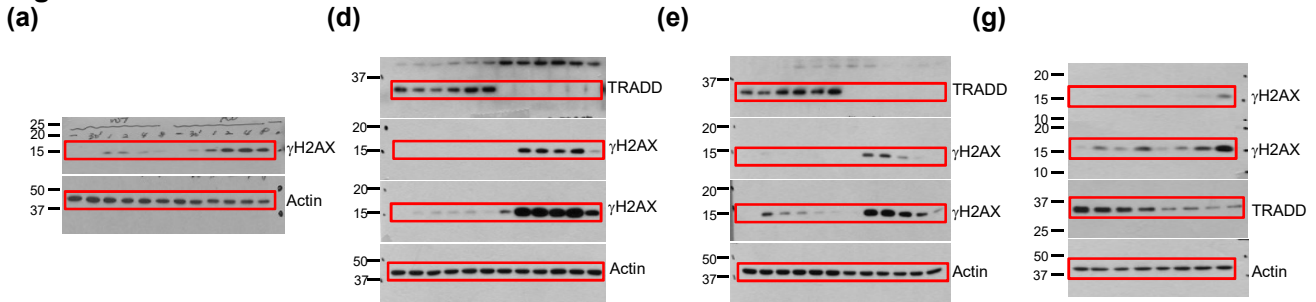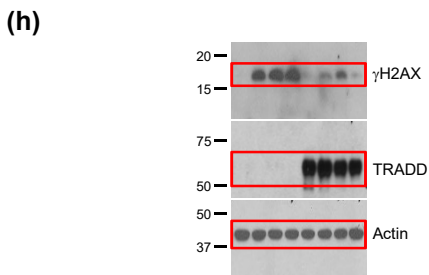

Figure 2

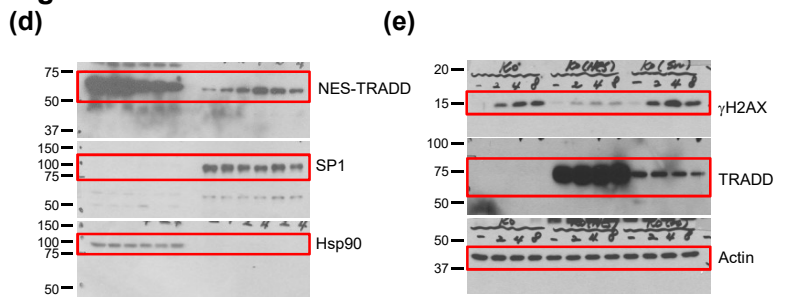

Figure 3

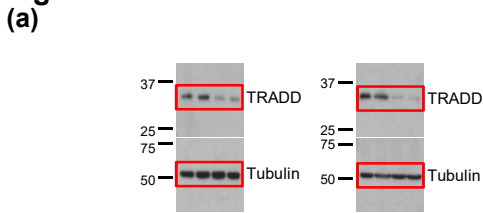

Figure 4

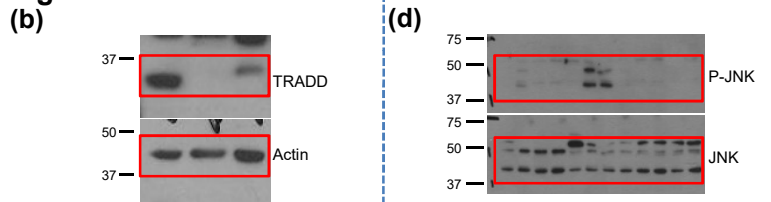

(g)

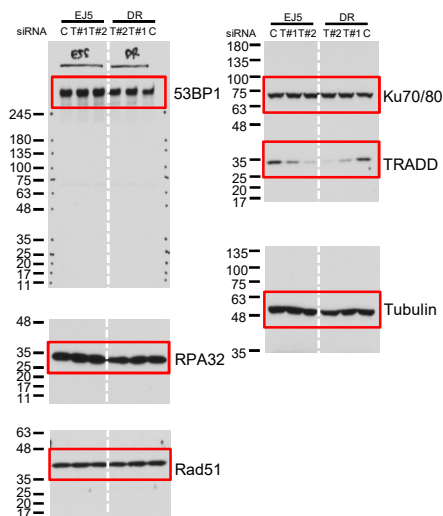

Figure 5

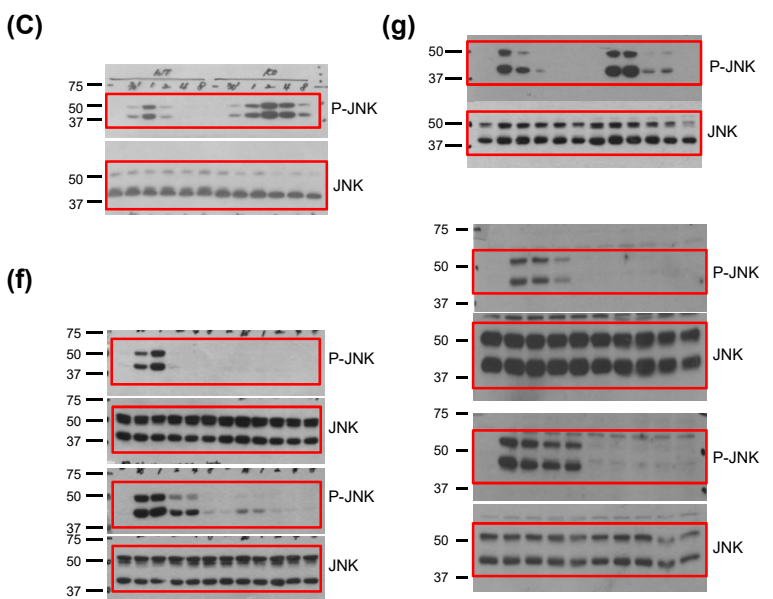

Supplement: 41598_2017_3211_MOESM1_ESM.pdf [file 41598_2017_3211_MOESM1_ESM.pdf]
